# Supplementary material
Source: Springer Nature journal article supplement (https://www.springermedizin.de/resource/supplementary/12943_2011_1058_MOESM12_ESM.pdf/9552120)

Colon normal cyto

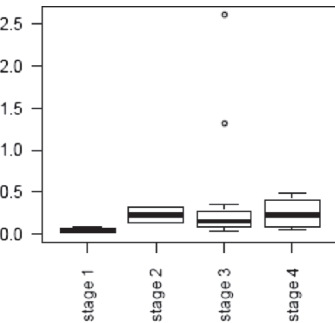

Colon normal nuc

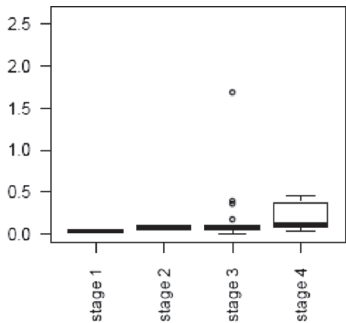

Colon tumor cyto

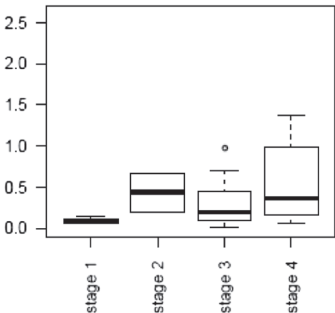

Colon tumor nuc

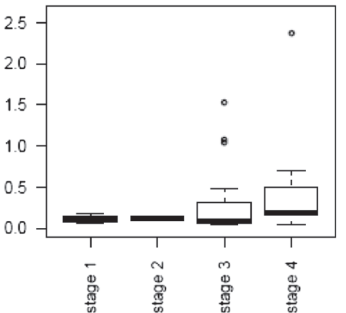

Supplement: MOESM12 [file 9552120]
